# Supplementary material for: Use of a do-it-yourself artificial pancreas system is associated with better glucose management and higher quality of life among adults with type 1 diabetes
Source: PubMed Central journal article supplement — Ther Adv Endocrinol Metab. 2020 Aug 25;11:2042018820950146. doi: 10.1177/2042018820950146 (PMC7453453; doi:10.1177/2042018820950146), 2020-08-25
Supplement: sj-pdf-1-tae-10.1177_2042018820950146.pdf [file sj-pdf-1-tae-10.1177_2042018820950146.pdf]

# Supplementary Appendix

## List of Contents

|    |                                                                                    |    |
|----|------------------------------------------------------------------------------------|----|
| 1  |                                                                                    |    |
| 2  | <b>List of Contents</b>                                                            |    |
| 3  | Introduction to T1D China Registry Study.....                                      | 2  |
| 4  | Diseases potentially interfering with the study .....                              | 3  |
| 5  | Survey on AndroidAPS during the first three-month’s use .....                      | 4  |
| 6  | Supplementary Figure S1. Flow Diagram for Identification of Eligible Patients..... | 5  |
| 7  | Supplementary Table S1. Settings of AndroidAPS Among Patients Enrolled .....       | 6  |
| 8  | Supplementary Table S2. Frequency of Reminders Patients Received from Relatives    |    |
| 9  | When Nightscout Alarms Were Activated .....                                        | 7  |
| 10 | Supplementary Table S3. Changes in Glycemic Control and Variability Before and     |    |
| 11 | After Three-Month of AndroidAPS Use Among Participants with Suboptimally           |    |
| 12 | Controlled Type 1 Diabetes .....                                                   | 8  |
| 13 | Supplementary Table S4. Changes in Glycemic Control and Variability Before and     |    |
| 14 | After Three-Month of AndroidAPS Use Among Participants with Well Controlled Type   |    |
| 15 | 1 Diabetes .....                                                                   | 9  |
| 16 | Supplementary Table S5. Changes in Glycemic Control and Glycemic Variability       |    |
| 17 | Between Baseline and After Three-Month of AndroidAPS Use Among Patients            |    |
| 18 | Stratified by Baseline HbA1c .....                                                 | 10 |
| 19 | Supplementary Table S6. Changes in Glycemic Control and Glycemic Variability       |    |
| 20 | Among Participants Before and After Three-Month of AndroidAPS Use During           |    |
| 21 | Daytime and Nighttime Periods.....                                                 | 11 |
| 22 | Supplementary Table S7. Relationship Between Duration of Pump Use and Change in    |    |
| 23 | Glucose Metrics Among All Participants .....                                       | 12 |
| 24 | Supplementary Table S8. Glycemic Metrics for Participant No. 5 Before and After    |    |
| 25 | Discontinuation of SMB Feature .....                                               | 13 |
| 26 | References.....                                                                    | 15 |

## 29 **Introduction to T1D China Registry Study**

30 T1D China Registry Study is a large-scale population and hospital-based registry  
31 focusing on T1D patients across China since 2014. It is inspired by large-scale registries  
32 including DPV Scientific Initiative of Germany and Austria, Hvidore Study Group and  
33 T1D Exchange Registry Study.

34

35 The T1D China Registry consists of three components: (1) a network of comprehensive  
36 and pediatric hospitals that is prospectively recruiting and following up patients  
37 affected by T1D; (2) a mobile platform called Tangtangquan (TTQ) serving as (i) an  
38 online community to provide diabetes self-management education and support and (ii)  
39 an online platform to collect and store demographic and clinical data at recruitment and  
40 follow-ups; and (3) a biobank to store biological human samples for use in research.

41 Demographic and clinical information of participants are collected at recruitment by  
42 HCPs in hospitals via the electronic medical record module in TTQ platform. QoL  
43 scales and food frequency questionnaire are performed in a proportion of patients to  
44 assess psychosocial status and food choice, respectively. Follow-ups are conducted via  
45 internet by HCPs every three months since recruitment, during which demographic and  
46 clinical information together with QoL scales and food frequency questionnaire data  
47 are collected. Clinical information includes diabetes history, treatment, and monitoring;  
48 general health; smoking/drinking status, diet, exercise; family history; socioeconomic  
49 factors; medications; acute and chronic diabetic complications; other medical  
50 conditions; and biological results.

51

52 The T1D China Registry Study is coordinated by the First Affiliated Hospital of  
53 University of Science and Technology of China, under the auspices of Chinese Medical  
54 Doctor Association. Participating hospitals were selected to provide a broad  
55 representation of pediatric and adult patients with T1D. As of January 20, 2020, 80

56 hospitals are participating, with a wide distribution throughout China, covering 22  
57 provincial-level administrative divisions. Four primarily care for pediatric patients, and  
58 the other 76 are comprehensive hospitals caring for both adult and pediatric patients.  
59 To be enrolled in the clinic registry, an individual must have a clinical diagnosis of  
60 T1D.<sup>1</sup> Specially, participants have to be insulin dependent, diagnosed with T1D by an  
61 endocrinologist from a secondary or tertiary hospital, and meet at least one of the  
62 following criteria: (i) obvious symptoms of a diabetes-related metabolic disorder; (ii)  
63 previous diabetic ketosis or ketoacidosis; (iii) tested positive for diabetes autoantibodies;  
64 and (iv) fasting and stimulated C-peptide levels <200 pmol/L.

65

66 The study protocol was approved by the Institutional Review Board of each  
67 participating hospital, and the study was conducted according to Good Clinical Practice  
68 guidelines and the Declaration of Helsinki. Written informed consent is obtained from  
69 adult participants and parents/guardians of minor participant. Minor participants  
70 provide written assent, according to Institutional Review Board requirements.

## 71 **Diseases potentially interfering with the study**

- 72 1. Clinically significant nephropathy (eGFR < 45ml/min) or renal failure on dialysis
- 73 2. Proliferative retinopathy
- 74 3. Liver function damage (aspartate aminotransferase 2.5 times higher than normal  
75 upper limit
- 76 4. Clinically significant cardiovascular disease, including myocardial infarction,  
77 arrhythmia, the ECG chart heart block (Type I second-degree AV block and above),  
78 unstable angina or decompensated heart failure (NYHA Graded III ~ IV)
- 79 5. Sickle cell disease, haemoglobinopathy or anemia
- 80 6. Uncontrolled coeliac disease
- 81 7. Eating disorder such as anorexia or bulimia
- 82 8. Cystic fibrosis, pancreatitis, pancreatic tumor, or any other pancreatic disease besides

83 type 1 diabetes

84 9. Adrenal disease or tumor

85

86 **Survey on AndroidAPS during the first three-month's use**

87 1. What continuous monitoring system did you use? Specify if you had switched (date,  
88 reason etc.).

89 2. What insulin pump did you use? Specify if you had switched (date, reason etc.).

90 3. Which version of AndroidAPS did you use? Specify if you had switched (date, reason  
91 etc.).

92 4. What glycemic target/range in AndroidAPS did you set? List them if the target/range  
93 was separated into different periods. Specify if you had switched (date, reason etc.).

94 5. Did you enable super micro bolus feature? Specify if you had switch (date, reason  
95 etc.).

96 6. Did you enable un-announced meal feature? Specify if you had switched (date,  
97 reason etc.).

98 7. Did you use remote monitoring feature (i.e. sharing data of AndroidAPS via  
99 Nightscout platform)? Specify if you had switched (date, reason etc.).

100 8. If the answer for Q7 was yes, how many reminders did you receive from your  
101 relatives when Nightscout alarms were activated every month? (Total, due to  
102 hypoglycemia and due to hyperglycemia)

103

104

105

106

107

108

109 **Supplementary Figure S1. Flow Diagram for Identification of Eligible**

110 **Patients**

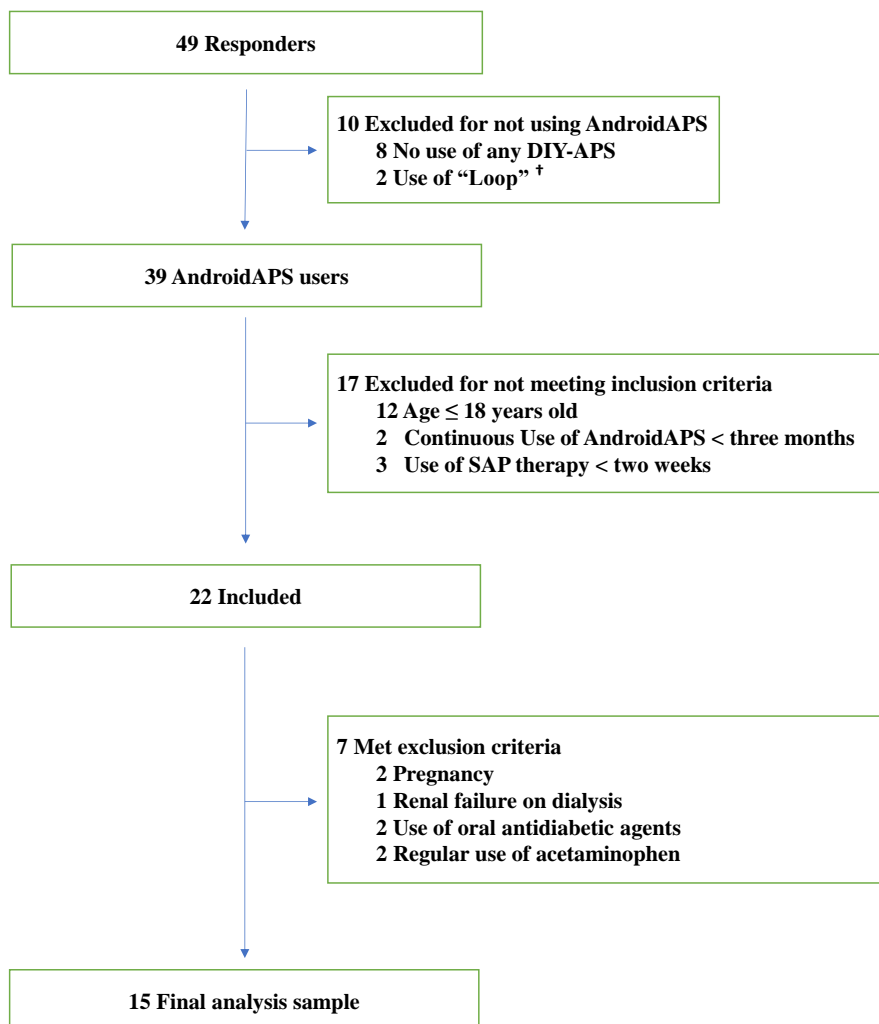

111

112 † One of the DIYAPSs that uses a different algorithm than AndroidAPS

113 **Abbreviation:** DIYAPS: do-it-yourself artificial pancreas system; T1D: type 1 diabetes

114

115

116

117

118

119

120

121 **Supplementary Table S1. Settings of AndroidAPS Among Patients**

122 **Enrolled**

| No. | CGM       | Pump   | Version of AndroidAPS | Glycemic Target in AndroidAPS (mmol/L)         | Use of SMB?      | Use of UAM? | Use of Remote Monitoring? |
|-----|-----------|--------|-----------------------|------------------------------------------------|------------------|-------------|---------------------------|
| 1   | Dexcom G5 | Dana R | 2.0                   | 5.6 <sup>†</sup><br>(23:00-07:00: 6.0)         | Yes              | Yes         | Yes (                     |
| 2   | Dexcom G5 | Dana R | 2.0                   | 6.0                                            | Yes              | Yes         | Yes                       |
| 3   | Dexcom G5 | Dana R | 2.0                   | 5.6                                            | Yes              | Yes         | Yes                       |
| 4   | Dexcom G5 | Dana R | 2.0                   | 5.5                                            | Yes              | Yes         | Yes                       |
| 5   | Dexcom G5 | Dana R | 2.0                   | 5.6<br>(00:00-07:00: 6.5)                      | Yes <sup>‡</sup> | Yes         | Yes                       |
| 6   | Dexcom G5 | Dana R | 2.0                   | 5.6                                            | Yes              | Yes         | Yes                       |
| 7   | Dexcom G5 | Dana R | 2.0                   | 5.6                                            | Yes              | Yes         | Yes                       |
| 8   | Dexcom G5 | Dana R | 2.0                   | 6.0<br>(07:00-10:00: 5.5)                      | Yes              | Yes         | Yes                       |
| 9   | Dexcom G5 | Dana R | 2.0                   | 5.6                                            | Yes              | Yes         | Yes                       |
| 10  | Dexcom G5 | Dana R | 2.0                   | 6.0<br>(00:00-07:00: 6.2)                      | Yes              | Yes         | Yes                       |
| 11  | Dexcom G5 | Dana R | 2.0                   | 5.6                                            | Yes              | Yes         | Yes                       |
| 12  | Dexcom G5 | Dana R | 2.0                   | 5.6<br>(00:00-04:30: 6.0;<br>17:00-23:00: 6.1) | Yes              | Yes         | Yes                       |
| 13  | Dexcom G5 | Dana R | 2.0                   | 5.6                                            | Yes              | Yes         | Yes                       |
| 14  | Dexcom G5 | Dana R | 2.0                   | 5.6                                            | Yes              | Yes         | Yes                       |
| 15  | Dexcom G5 | Dana R | 2.0                   | 5.6                                            | Yes              | Yes         | Yes                       |

123 † Glycemic target is 6.0 during 23:00-07:00, and 5.6 for the rest of the day. Similarly,  
 124 hereinafter. ‡SMB feature was disabled around two months after initiation of AndroidAPS for  
 125 fear of hypoglycemia

126 **Abbreviations:** CGM: continuous glucose monitoring; SMB: super micro bolus; UAM: un-  
 127 announced meal

128 **Supplementary Table S2. Frequency of Reminders Patients Received**  
 129 **from Relatives When Nightscout Alarms Were Activated**

| No. | Frequency of reminders,<br>total (per month) | Frequency of reminders,<br>hypoglycemia (per month) | Frequency of reminders,<br>hyperglycemia (per month) |
|-----|----------------------------------------------|-----------------------------------------------------|------------------------------------------------------|
| 1   | 20                                           | 12                                                  | 8                                                    |
| 2   | 10                                           | 9                                                   | 1                                                    |
| 3   | 0                                            | 0                                                   | 0                                                    |
| 4   | 4                                            | 4                                                   | 0                                                    |
| 5   | 0                                            | 0                                                   | 0                                                    |
| 6   | 0                                            | 0                                                   | 0                                                    |
| 7   | 0                                            | 0                                                   | 0                                                    |
| 8   | 4                                            | 1                                                   | 3                                                    |
| 9   | 0                                            | 0                                                   | 0                                                    |
| 10  | 16                                           | 12                                                  | 4                                                    |
| 11  | 0                                            | 0                                                   | 0                                                    |
| 12  | 1                                            | 1                                                   | 0                                                    |
| 13  | 12                                           | 1                                                   | 11                                                   |
| 14  | 70                                           | 35                                                  | 35                                                   |
| 15  | 12                                           | 1                                                   | 11                                                   |

131 **Supplementary Table S3. Changes in Glycemic Control and**  
 132 **Variability Before and After Three-Month of AndroidAPS Use Among**  
 133 **Participants with Suboptimally Controlled Type 1 Diabetes**

|                               | <b>Before use of<br/>AndroidAPS</b> | <b>After use of<br/>AndroidAPS</b> | <b>Difference</b>    | <b>P value</b> |
|-------------------------------|-------------------------------------|------------------------------------|----------------------|----------------|
| HbA1c (%) †                   | 8.20 (7.90, 8.90)                   | 6.90 (6.20, 7.30)                  | -1.50 (-1.90, -1.30) | 0.027          |
| Mean Glucose Value (mmol/L) † | 8.35 (7.98, 8.43)                   | 7.29 (7.03, 7.80)                  | -1.16 (-1.24, 0)     | 0.063          |
| TIT (3.9-7.8 mmol/L) (%)      | 45.87±9.97                          | 62.44±10.73                        | 16.57±10.81          | 0.007          |
| TIR (3.9-10.0 mmol/L) (%)     | 72.11±12.78                         | 84.29±8.93                         | 12.18±8.45           | 0.009          |
| % CGM Time < 3.0 mmol/L       | 0.69±0.64                           | 0.28±0.33                          | -0.41±0.43           | 0.043          |
| % CGM Time < 3.9 mmol/L       | 3.22±2.24                           | 1.45±1.04                          | -1.77±1.52           | 0.021          |
| % CGM Time > 10.0 mmol/L      | 24.67±10.98                         | 14.27±8.14                         | -10.41±8.30          | 0.016          |
| % CGM Time > 13.9 mmol/L      | 4.62±2.68                           | 2.35±2.47                          | -2.27±2.47           | 0.051          |
| SD (mmol/L)                   | 2.84±0.63                           | 2.33±0.55                          | -0.51±0.47           | 0.029          |
| CV (%)                        | 34.42±6.48                          | 30.94±5.29                         | -3.48±5.53           | 0.147          |
| MAGE (mmol/L)                 | 7.49±1.69                           | 6.10±1.40                          | -1.40±1.39           | 0.037          |

134 † Variables are presented as median (interquartile), other variables are presented as mean±SD  
 135 **Abbreviations:** CGM: continuous glucose monitoring; CV: coefficient of variation; HbA1c:  
 136 hemoglobin A1c; MAGE: mean amplitude of glycemic excursion; SD: standard deviation;  
 137 TIR: time in range; TIT: time in target

138  
 139  
 140  
 141  
 142  
 143  
 144  
 145  
 146  
 147



148 **Supplementary Table S4. Changes in Glycemic Control and**  
 149 **Variability Before and After Three-Month of AndroidAPS Use Among**  
 150 **Participants with Well Controlled Type 1 Diabetes**

|                             | <b>Before use of<br/>AndroidAPS</b> | <b>After use of<br/>AndroidAPS</b> | <b>Difference</b>   | <b>P value</b> |
|-----------------------------|-------------------------------------|------------------------------------|---------------------|----------------|
| HbA1c (%)                   | 6.84±0.37                           | 6.42±0.59                          | -0.42±0.41          | 0.025          |
| Mean Glucose Value (mmol/L) | 7.86±0.60                           | 7.39±0.57                          | -0.47±0.39          | 0.011          |
| TIT (3.9-7.8 mmol/L) (%)    | 51.61±7.37                          | 62.10±9.03                         | 10.50±6.47          | 0.003          |
| TIR (3.9-10.0 mmol/L) (%)   | 77.55±7.03                          | 84.27±5.23                         | 6.72±3.61           | 0.001          |
| % CGM Time < 3.0 mmol/L†    | 0.27 (0.11, 0.64)                   | 0.18 (0.11, 0.42)                  | -0.06 (-0.28, 0.08) | 0.401          |
| % CGM Time < 3.9 mmol/L     | 2.49±1.78                           | 1.96±0.91                          | -0.53±1.23          | 0.265          |
| % CGM Time > 10.0 mmol/L    | 19.97±8.32                          | 13.77±5.84                         | -6.20±4.47          | 0.006          |
| % CGM Time > 13.9 mmol/L    | 2.28±1.83                           | 1.89±1.27                          | -0.40±1.11          | 0.344          |
| SD (mmol/L)                 | 2.51±0.30                           | 2.35±0.22                          | -0.16±0.16          | 0.029          |
| CV (%)                      | 31.89±3.00                          | 31.77±1.48                         | -0.11±2.26          | 0.892          |
| MAGE (mmol/L)               | 6.30±0.66                           | 5.80±0.68                          | -0.50±0.28          | 0.001          |

151 † Variables are presented as median (interquartile), other variables are presented as mean±SD  
 152 **Abbreviations:** CGM: continuous glucose monitoring; CV: coefficient of variation; HbA1c:  
 153 hemoglobin A1c; MAGE: mean amplitude of glycemic excursion; SD: standard deviation;  
 154 TIR: time in range; TIT: time in target

155  
 156  
 157  
 158  
 159  
 160  
 161  
 162  
 163  
 164  
 165  
 166  
 167  
 168

169 **Supplementary Table S5. Changes in Glycemic Control and Glycemic**  
 170 **Variability Between Baseline and After Three-Month of AndroidAPS**  
 171 **Use Among Patients Stratified by Baseline HbA1c**

|                             | Well Controlled<br>(N=8) | Suboptimally Controlled<br>(N=7) | P value |
|-----------------------------|--------------------------|----------------------------------|---------|
| HbA1c (%)                   | -0.48 (-0.67, -0.05)     | -1.50 (-1.90, -1.30)             | 0.020   |
| Mean Glucose Value (mmol/L) | -0.60 (-0.82, -0.06)     | -1.16 (-1.24, 0)                 | 0.355   |
| TIR (3.9-10.0 mmol/L) (%)   | 6.72±3.61                | 12.18±8.45                       | 0.152   |
| % CGM Time < 3.9 mmol/L     | -0.53±1.23               | -1.77±1.52                       | 0.103   |
| % CGM Time > 10.0 mmol/L    | -6.20±4.47               | -10.41±8.30                      | 0.235   |
| SD (mmol/L) †               | -0.16±0.16               | -0.51±0.47                       | 0.100   |
| CV (%) †                    | -0.11±2.26               | -3.47±5.53                       | 0.138   |
| MAGE (mmol/L) †             | -0.50±0.28               | -1.40±1.39                       | 0.140   |

172 † Variable is presented as median (interquartile), other variables are presented as mean ±  
 173 standard deviation

174 **Abbreviations:** CGM: continuous glucose monitoring; CV: coefficient of variation; HbA1c:  
 175 hemoglobin A1c; MAGE: mean amplitude of glycemic excursion; SD: standard deviation;  
 176 TIR: time in range

177  
 178  
 179  
 180  
 181  
 182  
 183  
 184  
 185  
 186  
 187  
 188  
 189  
 190  
 191  
 192  
 193

194 **Supplementary Table S6. Changes in Glycemic Control and Glycemic**  
 195 **Variability Among Participants Before and After Three-Month of**  
 196 **AndroidAPS Use During Daytime and Nighttime Periods**

|                             | <b>Before use of<br/>AndroidAPS</b> | <b>After use of<br/>AndroidAPS</b> | <b>Difference</b>    | <b>P value</b> |
|-----------------------------|-------------------------------------|------------------------------------|----------------------|----------------|
| <b>Nighttime Period</b>     |                                     |                                    |                      |                |
| Mean Glucose Value (mmol/L) | 8.14±0.79                           | 7.03±0.74                          | -1.11±1.07           | 0.001          |
| TIR (3.9-10.0 mmol/L) (%)   | 73.60±16.00                         | 89.55±7.38                         | 15.95±15.55          | 0.001          |
| % CGM Time < 3.9 mmol/L     | 3.11±2.58                           | 1.49±1.16                          | -1.62±2.25           | 0.014          |
| % CGM Time > 10.0 mmol/L    | 23.29±14.87                         | 8.96±7.45                          | -14.32±14.79         | 0.002          |
| SD (mmol/L) †               | 2.38 (2.25, 3.14)                   | 2.00 (1.48, 2.49)                  | -0.48 (-0.89, -0.19) | 0.005          |
| CV (%) †                    | 31.40 (26.51, 35.93)                | 27.23 (23.7, 33.09)                | -1.80 (-7.21, 1.22)  | 0.061          |
| <b>Daytime Period</b>       |                                     |                                    |                      |                |
| Mean Glucose Value (mmol/L) | 7.99±0.61                           | 7.56±0.55                          | -0.43±0.47           | 0.003          |
| TIR (3.9-10.0 mmol/L) (%)   | 75.46±9.32                          | 82.52±7.21                         | 7.06±5.32            | <0.001         |
| % CGM Time < 3.9 mmol/L     | 2.75±2.02                           | 1.80±1.05                          | -0.96±1.53           | 0.030          |
| % CGM Time > 10.0 mmol/L    | 21.79±8.96                          | 15.68±6.96                         | -6.11±5.41           | 0.001          |
| SD (mmol/L)                 | 2.65±0.49                           | 2.41±0.40                          | -0.24±0.37           | 0.025          |
| CV (%)                      | 33.04±4.85                          | 31.75±3.56                         | -1.28±4.25           | 0.262          |

197 † Variable is presented as median (interquartile), other variables are presented as mean ±  
 198 standard deviation

199 **Abbreviations:** CGM: continuous glucose monitoring; CV: coefficient of variation; SD:  
 200 standard deviation; TIR: time in range

201  
 202  
 203  
 204  
 205  
 206  
 207  
 208

209 **Supplementary Table S7. Relationship Between Duration of Pump Use**  
 210 **and Change in Glucose Metrics Among All Participants**

|                             |                         |                                       |                    |                         |
|-----------------------------|-------------------------|---------------------------------------|--------------------|-------------------------|
|                             | Change in HbA1c (%)     | Change in mean glucose value (mmol/L) | Change in TIR% (%) | Change in TBR 3.9% (%)  |
| Duration of pump use (year) | R=0.350 (NS)            | R=-0.014 (NS)                         | R=-0.043 (NS)      | R=0.025 (NS)            |
|                             | Change in TAR 10.0% (%) | Change in SD (mmol/L)                 | Change in CV (%)   | Change in MAGE (mmol/L) |
| Duration of pump use (year) | R=-0.018 (NS)           | R=-0.086 (NS)                         | R=0.136 (NS)       | R=-0.014 (NS)           |

211 All analyses were performed by using spearman correlation coefficient

212 NS:  $P \geq 0.05$

213 **Abbreviations:** CV: coefficient of variation; HbA1c: hemoglobin A1c; MAGE: mean  
 214 amplitude of glycemc excursion; SD: standard deviation; TBR 3.9%: percentage of time <  
 215 3.9 mmol/L; TIR: time in range

216

217

218 **Supplementary Table S8. Glycemic Metrics for Participant No. 5**

219 **Before and After Discontinuation of SMB Feature**

|                             | <b>AndroidAPS,<br/>SMB-abled<br/>(Months 1-2)</b> | <b>AndroidAPS,<br/>SMB-disabled<br/>(Month 3)</b> |
|-----------------------------|---------------------------------------------------|---------------------------------------------------|
| 24 Hours                    |                                                   |                                                   |
| Mean Glucose Value (mmol/L) | 7.02                                              | 6.94                                              |
| TIR (3.9-10.0 mmol/L) (%)   | 88.27                                             | 89.15                                             |
| % CGM Time < 3.9 mmol/L     | 1.90                                              | 2.16                                              |
| % CGM Time > 10.0 mmol/L    | 9.83                                              | 8.70                                              |
| SD (mmol/L)                 | 2.19                                              | 2.10                                              |
| CV (%)                      | 31.18                                             | 30.29                                             |
| MAGE (mmol/L)               | 5.48                                              | 5.65                                              |
| Nighttime                   |                                                   |                                                   |
| Mean Glucose Value (mmol/L) | 6.65                                              | 6.14                                              |
| TIR (3.9-10.0 mmol/L) (%)   | 95.24                                             | 96.17                                             |
| % CGM Time < 3.9 mmol/L     | 1.28                                              | 3.13                                              |
| % CGM Time > 10.0 mmol/L    | 3.48                                              | 0.70                                              |
| SD (mmol/L)                 | 1.54                                              | 1.32                                              |
| CV (%)                      | 23.10                                             | 21.45                                             |
| Daytime                     |                                                   |                                                   |
| Mean Glucose Value (mmol/L) | 7.14                                              | 7.21                                              |
| TIR (3.9-10.0 mmol/L) (%)   | 86.05                                             | 86.72                                             |
| % CGM Time < 3.9 mmol/L     | 2.09                                              | 1.82                                              |
| % CGM Time > 10.0 mmol/L    | 11.86                                             | 11.47                                             |
| SD (mmol/L)                 | 2.35                                              | 2.25                                              |
| CV (%)                      | 32.89                                             | 31.15                                             |

220

221        **Abbreviations:** CGM: continuous glucose monitoring; CV: coefficient of variation;  
222        HbA1c: hemoglobin A1c; MAGE: mean amplitude of glycemic excursion; SD:  
223        standard deviation; TIR: time in range

224 **References**

- 225 1. Yang D, Deng H, Luo G, et al. Demographic and clinical characteristics of patients with type 1  
226 diabetes mellitus: A multicenter registry study in Guangdong, China. *Journal of diabetes*.  
227 2016;8(6):847-853.

228
